# Supplementary material
Source: PubMed Central journal article supplement (PMC3555111)
Supplement: Supp_Fig1.pdf [file Supp_Fig1.pdf]

## Supplementary Data

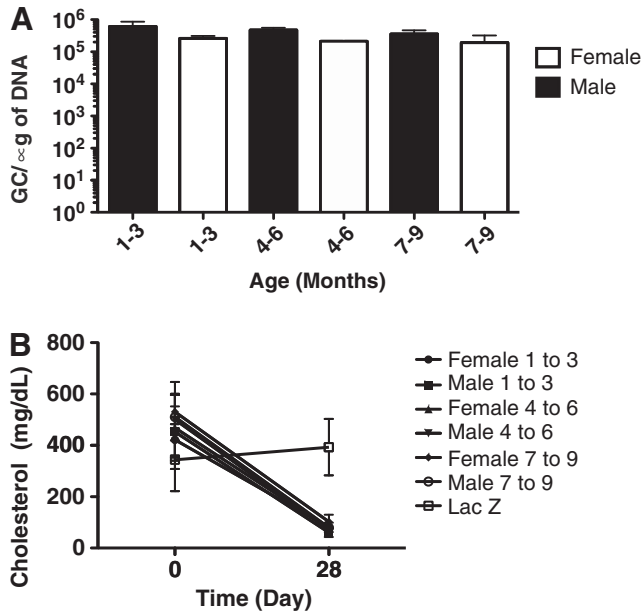

**SUPPLEMENTARY FIG. S1.** AAV8.TBG.hLDLR gene transfer is equally efficacious in both male and female LA-DKO mice (double-knockout mice, deficient in both *Ldlr* and *Apobec1*), irrespective of age. Mice of the indicated age and gender were intravenously injected with AAV8.TBG.hLDLR vector at  $5 \times 10^{12}$  genome copies (GC)/kg. **(A)** The amount of vector genomes in the liver of LA-DKO mice ( $n=6$  mice per group per gender) was assessed by TaqMan analysis of total genomic DNA harvested on day 28 after vector administration. The limit of detection was 10 GC/ $\mu$ g DNA. No statistically significant differences were detected between any of the groups examined. **(B)** Total serum cholesterol was measured on days 0 and day 28 postinjection of vector. No statistically significant differences were detected between any of the groups examined.
