# Supplementary material
Source: PubMed Central journal article supplement (PMC3555111)
Supplement: Supp_Table1.pdf [file Supp_Table1.pdf]

SUPPLEMENTARY TABLE S1. PLASMA LIPID PROFILE OF APOBEC<sup>-/-</sup>hApo B-Tg MICE WITH DIFFERENT LDLR ALLELES

|        | <i>Genotyping (LDLR)</i> | <i>TC (mg/dl)</i> | <i>HDL-C (mg/dl)</i> | <i>TG (mg/dl)</i> | <i>hApoB (mg/dl)</i> | <i>T-Ch/hApoB</i> |
|--------|--------------------------|-------------------|----------------------|-------------------|----------------------|-------------------|
| Female | WT                       | 173 ± 36          | 56 ± 3               | 173 ± 60          | 86 ± 24              | 2.1 ± 0.44        |
|        | Hetero                   | 268 ± 24          | 68 ± 3               | 172 ± 60          | 114 ± 27             | 2.4 ± 0.37        |
|        | KO                       | 727 ± 107         | 95 ± 9               | 391 ± 125         | 277 ± 46             | 2.7 ± 0.64        |
| Male   | WT                       | 157 ± 25          | 58 ± 6               | 222 ± 69          | 79 ± 22              | 2.1 ± 0.39        |
|        | Hetero                   | 239 ± 53          | 73 ± 6               | 233 ± 51          | 119 ± 57             | 2.2 ± 0.41        |
|        | KO                       | 782 ± 131         | 100 ± 17             | 546 ± 207         | 283 ± 65             | 2.9 ± 0.66        |

*apobec*, gene encoding apolipoprotein B mRNA editing catalytic polypeptide; hApoB-Tg, human apolipoprotein B-transgenic; HDL-C, high-density lipoprotein-cholesterol; hetero, heterozygous; KO, knockout; LDLR, low-density lipoprotein receptor; TC, and T-Ch, total cholesterol; TG, total glycerides; WT, wild type.
